# Supplementary material for: Influence of the Casein Composite Genotype on Milk Quality and Coagulation Properties in the Endangered Agerolese Cattle Breed
Source: PubMed Central journal article supplement (PMC7278449; doi:10.3390/ani10050892), 2020-05-20
Supplement: animals-10-00892-s001.pdf [file animals-10-00892-s001.pdf]

1 Supplementary Material

2

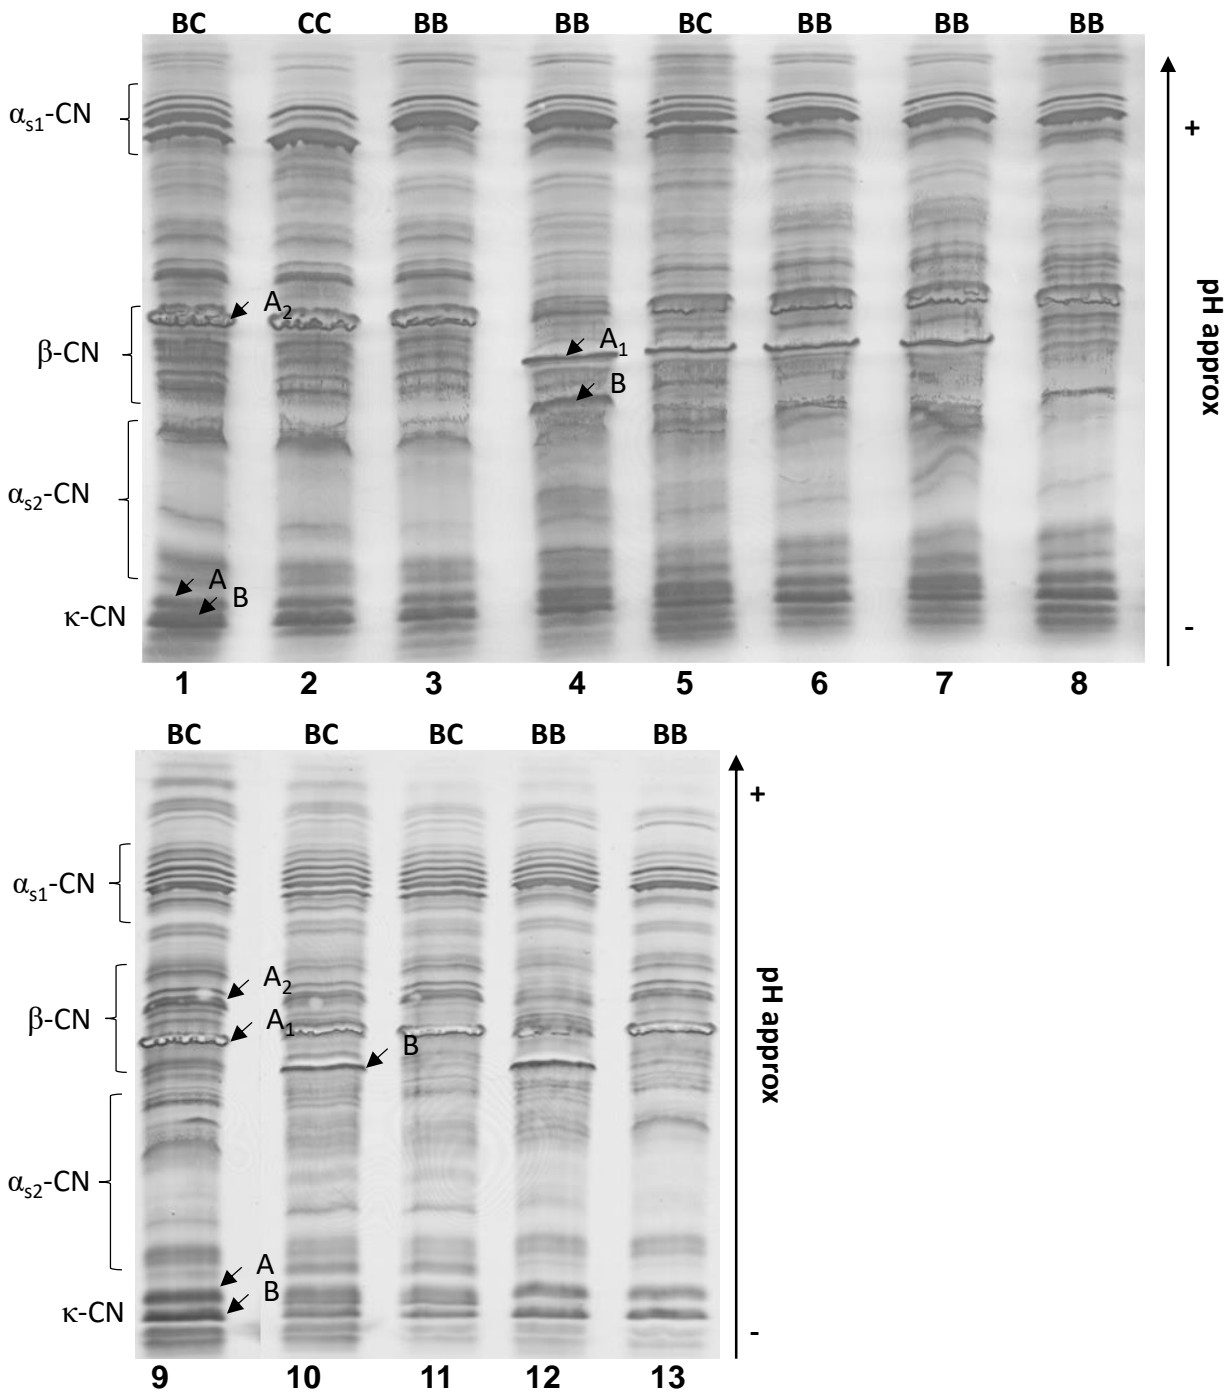

3

4

5

6

7

8

9

10

11

12

13

14

**Supplementary Figure 1.** The figure shows the 13 most representative electrophoretic profiles of the analysed 84 individual milk samples analysis. On the top of the lane is reported the genotype of *CSN1S1*. The arrows highlight typical bands of main variants of *CSN2* (A<sub>1</sub>, A<sub>2</sub> and B variants) and *CSN3* (A and B variants).

15

16 **Supplementary Table 1.** Oligonucleotide primers sequence and positions.

| <i>Locus</i>  | Position nt |                                    | Primers sequence (5'-3') | EMBL                        |          |
|---------------|-------------|------------------------------------|--------------------------|-----------------------------|----------|
| <i>CSN3</i>   | Exon 4      | 5189-5213                          | Forward                  | CACGTCACCCACACCCACATTTATC   | X14908.1 |
|               |             | Complementary to:<br>5567-5542     | Reverse                  | TAATTAGCCCATTTTCGCCTTCTCTGT |          |
| <i>CSN1S1</i> | Exon 19     | 27587 - 27604                      | Forward                  | CATGCAGCATAACTAACC          | X59856.2 |
|               |             | Complementary to:<br>28269 - 28252 | Reverse                  | TACTACACTGCTGTTCTC          |          |

17

18

19

20 **Supplementary Table 2.** Frequencies of *CSN1S1*, *CSN2* and *CSN3* composite genotypes.

| Composite genotype                                                                                                                                                                                                                                    | %     |
|-------------------------------------------------------------------------------------------------------------------------------------------------------------------------------------------------------------------------------------------------------|-------|
| BBA <sup>1</sup> A <sup>2</sup> AB                                                                                                                                                                                                                    | 19.05 |
| BBA <sup>2</sup> A <sup>2</sup> AB                                                                                                                                                                                                                    | 19.05 |
| BCA <sup>2</sup> A <sup>2</sup> AB                                                                                                                                                                                                                    | 13.11 |
| BBA <sup>2</sup> A <sup>2</sup> BB                                                                                                                                                                                                                    | 11.90 |
| BBA <sup>1</sup> A <sup>2</sup> BB                                                                                                                                                                                                                    | 10.71 |
| BCA <sup>1</sup> A <sup>1</sup> AB                                                                                                                                                                                                                    | 3.57  |
| BBA <sup>1</sup> A <sup>1</sup> AB / BBA <sup>1</sup> A <sup>2</sup> AA / BBA <sup>1</sup> BAB / BCA <sup>1</sup> A <sup>2</sup> AB /<br>BCA <sup>1</sup> BBB / BCA <sup>2</sup> A <sup>2</sup> AA                                                    | 2.38  |
| BBA <sup>1</sup> A <sup>1</sup> AA / BBA <sup>1</sup> A <sup>1</sup> AB / BBA <sup>2</sup> A <sup>2</sup> AA / BBA <sup>1</sup> BBB /<br>BCA <sup>1</sup> A <sup>1</sup> AA / BCA <sup>1</sup> A <sup>2</sup> BB / CCA <sup>2</sup> A <sup>2</sup> AB | 1.19  |
